# Supplementary material for: Contribution of sea-ice albedo and insulation effects to Arctic amplification in the EC-Earth Pliocene simulation
Source: Copernicus journal article supplement (doi:10.5194/cp-2018-59), 2018-06-12
Supplement: Supplementary file 1 [file cp-2018-59-supplement.pdf]

## Supplementary Information

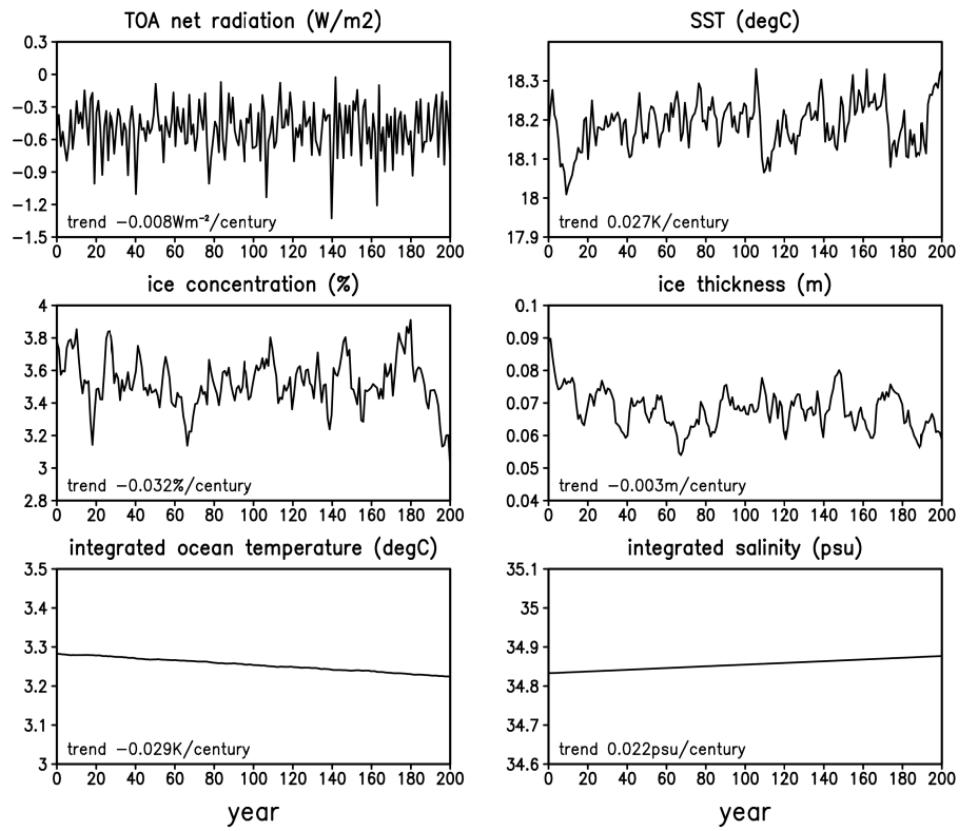

Figure S1. The annual mean of last 200 model years output in the Pliocene simulation
